# Supplementary material
Source: Springer Nature journal article supplement (https://www.springermedizin.de/resource/supplementary/12936_2012_2502_MOESM2_ESM.pdf/9543128)
Supplement: MOESM2 [file 9543128]

The WHO Standard Slide Panel consists of 55 slides divided into two slide sets. Ten minutes are allotted to review each slide.

**Slide Set 1 (40 slides):** Assessment of presence/absence of parasites, and species identification

- 20 negative slides ('clean' negatives free of significant artefacts):
- 20 positive slides of low density (80-200 parasites/ $\mu$ L):
  - 10 *Pf* slides
  - 4 mixed (2) species slides (incl. *Pf*; each species >40 parasites/ $\mu$ L, co-infecting species according to local prevalence)
  - 6 *Pm*, *Pv*, and/or *Po* slides (incl. at least one of each species, ratio according to local prevalence)

**Slide Set 2 (15 positive slides):** Assessment of quantitation (counting)

- 3-5 *Pf* (200-500 parasites/ $\mu$ L)
- 9-10 *Pf* (500-2000 parasites/ $\mu$ L)
- 2 *Pf* (>100 000 parasites/ $\mu$ L)

A third set, **Slide Set 3**, is used for the pre-course test on day 1. It contains an approximately 25% sub-set (14 slides) of the slides from Slide Sets 1 and 2. For example;

- 5 negative slides from Slide Set 1
- 5 low positive slides from Slide Set 1 (2 x *Pf*, 1 x mixed *Pf/Pv*, 1 x *Pm*, 1 x *Po*)
- 4 for counting, from Slide Set 2 (1 x *Pf* 200-500 parasites/ $\mu$ L, 2 x *Pf* 500-2,000 parasites/ $\mu$ L, 1 x *Pf* >100,000 parasites/ $\mu$ L)

*Pf*: *P. falciparum*. *Pv*: *P. vivax*. *Pm*: *P. malariae*. *Po*: *P. ovale*.
